# Supplementary material for: Cerebrovascular Injury After Serial Exposure to Chronic Stress and Abstinence from Methamphetamine Self-Administration
Source: PubMed Central journal article supplement (PMC6043597; doi:10.1038/s41598-018-28970-1), 2018-07-12

# **Cerebrovascular Injury After Serial Exposure to Chronic Stress and Abstinence from Methamphetamine Self-Administration**

Reka Natarajan<sup>1</sup>, Carmen M. Mitchell<sup>1</sup>, Nicole Harless<sup>2</sup>, and Bryan K. Yamamoto<sup>1\*</sup>

<sup>1</sup> Department of Pharmacology and Toxicology, Indiana University School of Medicine  
635 Barnhill Drive MS A401, Indianapolis IN 46202

<sup>2</sup> Department of Neurosciences, University of Toledo College of Medicine  
3000 Arlington Avenue MS 1007, Toledo OH 43614

Corresponding Author: Bryan K. Yamamoto

Email: [brkyama@iu.edu](mailto:brkyama@iu.edu)

Supplementary Figure 1

The bands presented in Figure 2 were obtained from the following blots. The boxes noted below identify the lanes used in the figures within the main paper.

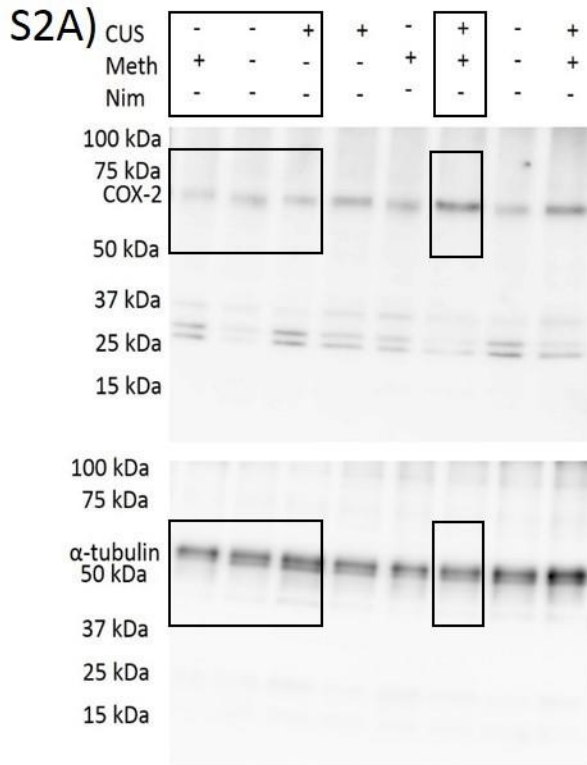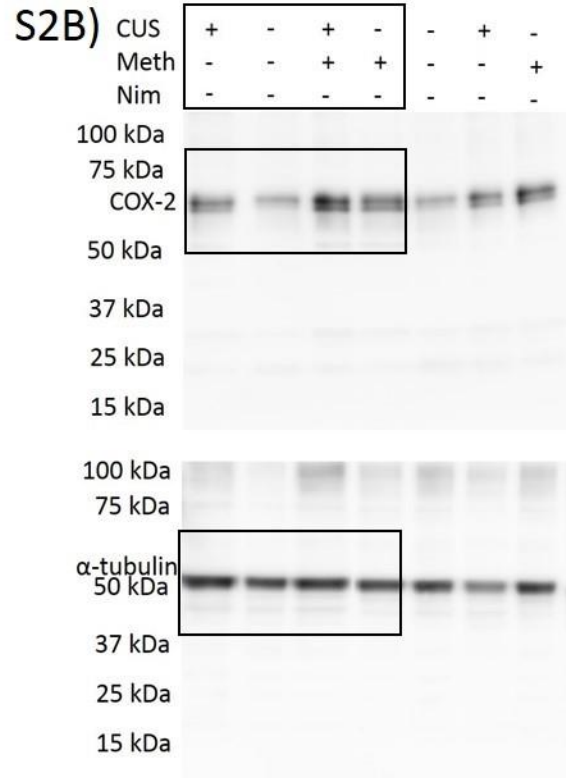

Supplementary Figure 2

The bands presented in Figure 3 were obtained from the following blots. The boxes noted below identify the lanes used in the figures within the main paper.

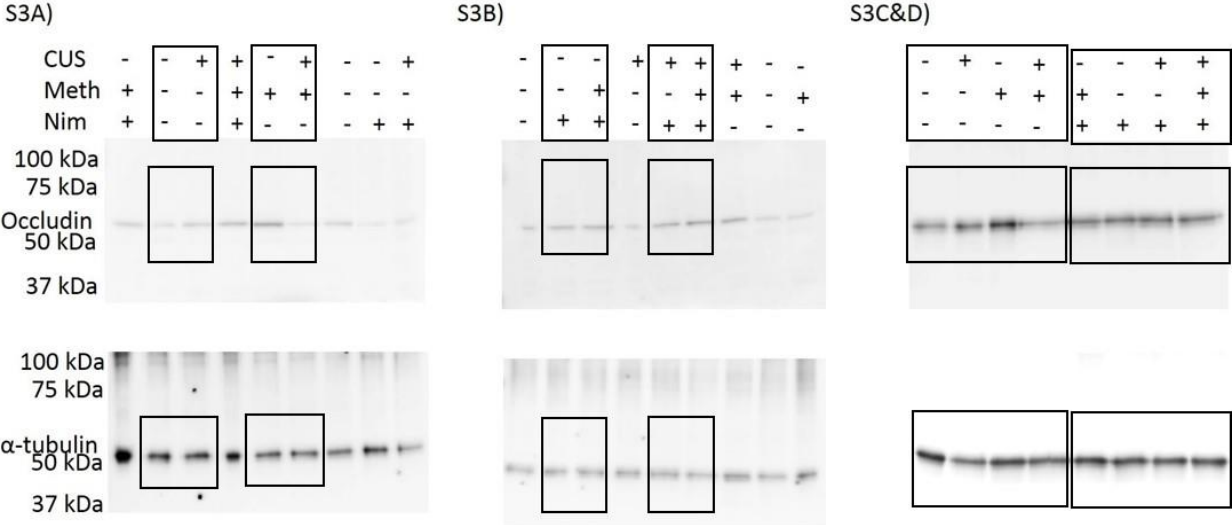

Supplementary Figure 3

The bands presented in Figure 4 were obtained from the following blots. The boxes identify the lanes used in the figures within the main paper. Short and long duration exposures corresponding to the full and truncated  $\beta$ -dystroglycan bands are presented in S4C and S4D and shown in Figure 4C and D of the main paper.

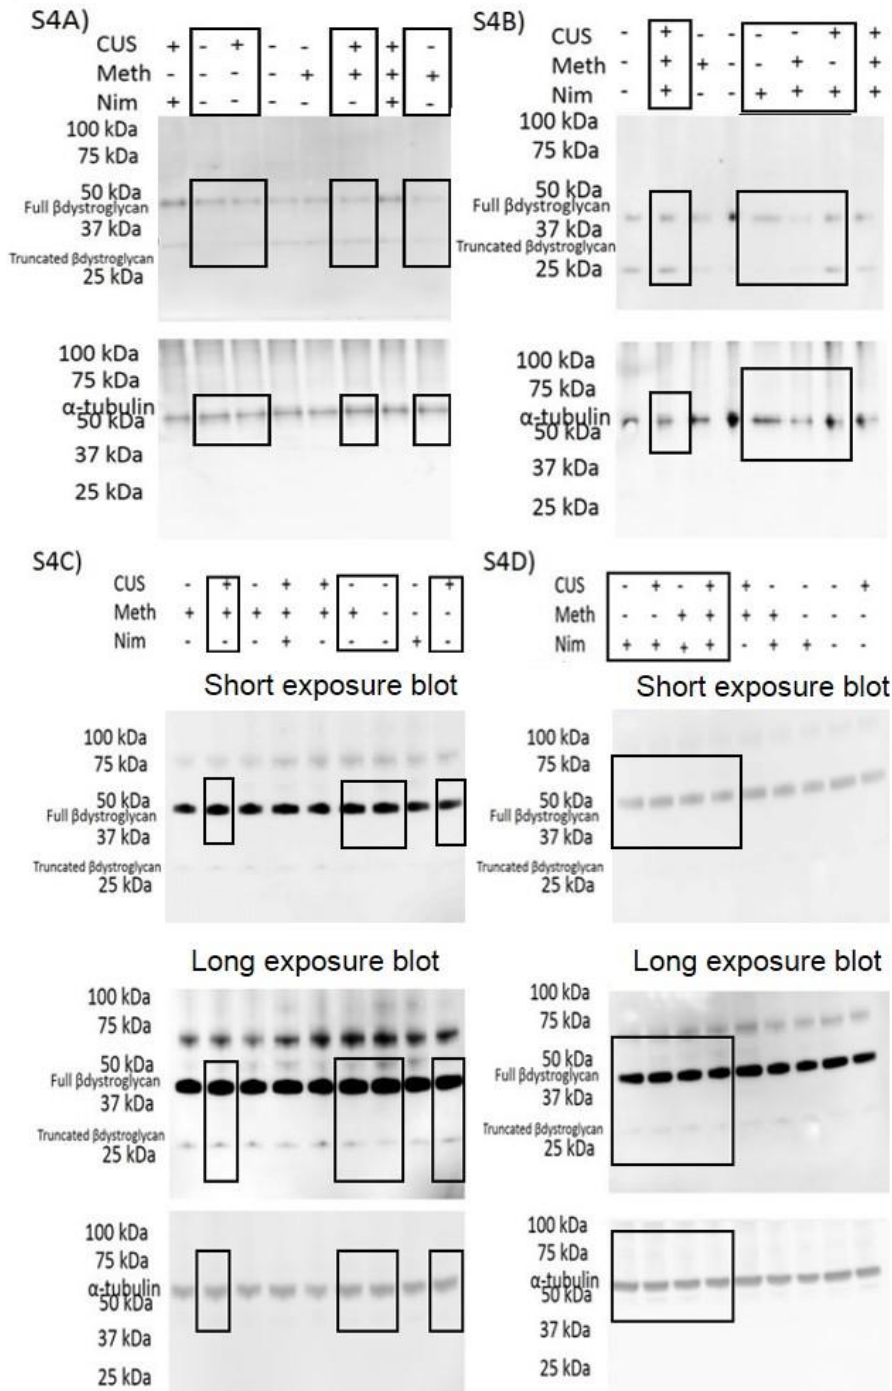

Supplement: 41598_2018_28970_MOESM1_ESM.pdf [file 41598_2018_28970_MOESM1_ESM.pdf]
